# Supplementary material for: Topography preserved microwave plasma etching for top-down layer engineering in MoS2and other van der Waals materials
Source: Royal Society of Chemistry journal article supplement (doi:10.1039/c7nr00284j), 2017-01-01

## **Supporting Information**

### **Topography preserved microwave plasma etching for top-down layer engineering in MoS<sub>2</sub> and other van der Waals materials**

Abin Varghese, Chithra H. Sharma and Madhu Thalakulam\*

School of Physics, Indian Institute of Science Education and Research  
Thiruvananthapuram

## S1: Thickness dependent color profile of MoS<sub>2</sub> flakes

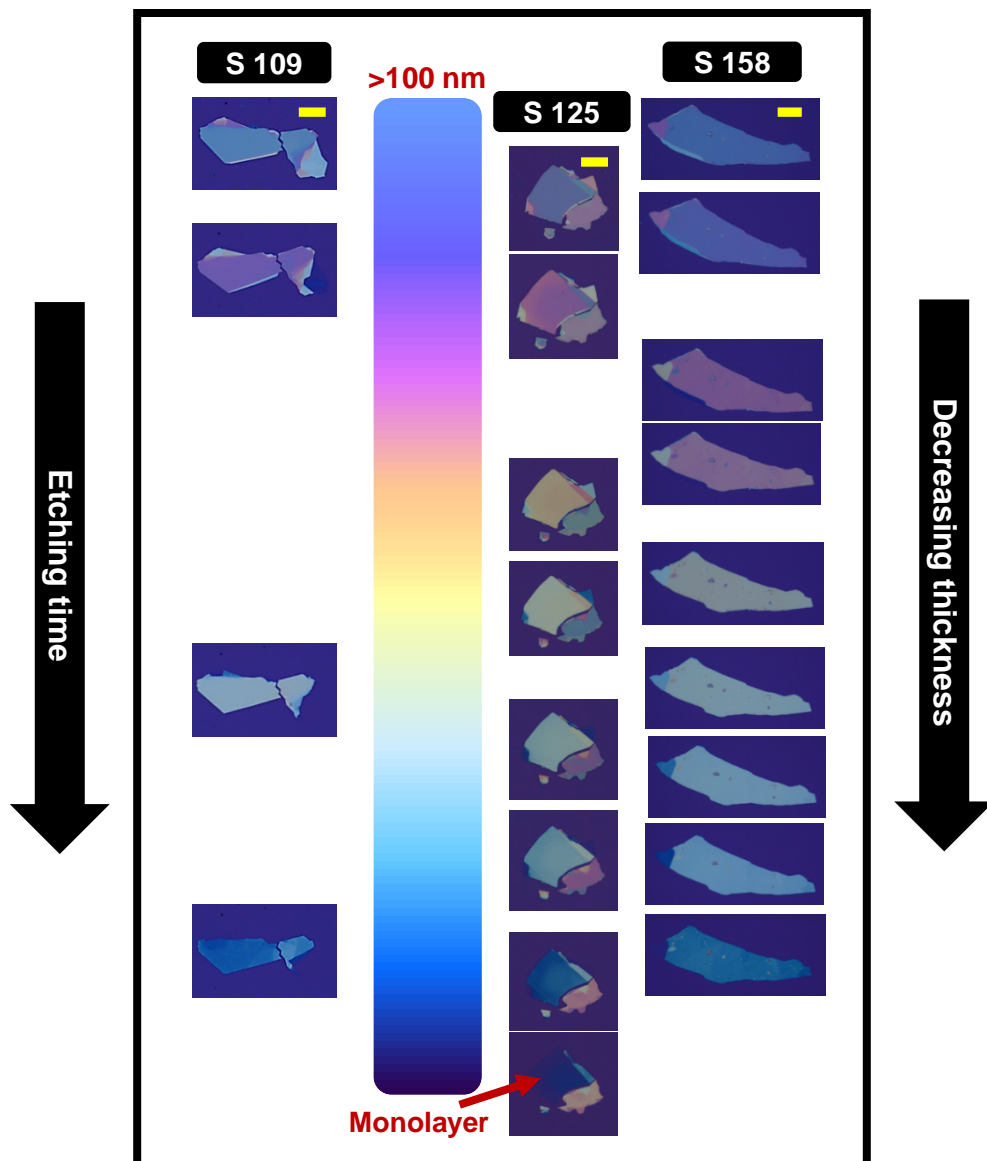

The optical images of MoS<sub>2</sub> flakes on 300 nm SiO<sub>2</sub>/Si substrate taken using Olympus BX51M trinocular microscope (with U-25LBD color temperature conversion filter, preset illumination and 10 ms exposure time) after various stages of etching are shown. Bulk MoS<sub>2</sub> flakes which are around 100 nm thick appear bright sky-blue in color. As the flakes are uniformly etched down they show a color change due to an increase in transparency on approaching the few-layer-limit. S-109, S-125 and S-158 are representative samples. S-125 has been thinned down to the monolayer after several controlled etching steps. The scale bars in yellow correspond to 20  $\mu\text{m}$ .

## S2: Thickness analysis using optical contrast method for the fine etch process

We utilize the thickness identification by optical imaging technique put forward by Wang *et al*, 2012 *Nanotechnology* **23** 495713. to determine the thickness of MoS<sub>2</sub> flakes upto 6 layers. To demonstrate the fine etching process and the layer-by-layer etching nature, we start with a sample having two distinct regions (plateaux) marked as 6L and 5L respectively in the R-channel image (a) below. The first step of fine-etching is carried out for 6 minutes, during which two layers are removed from either regions to yield 4L and 3L regions respectively as shown in (b). The second step, also for 6 minutes, leads to subsequent etching of 4L to 3L regions down to 2L to 1L respectively, preserving the initial topography as shown in (c). The scale bar is 20  $\mu\text{m}$ . (a), (b) and (c) are the red channel images of (d), (e) and (f) respectively which are used to extract the thickness information using the optical contrast method.

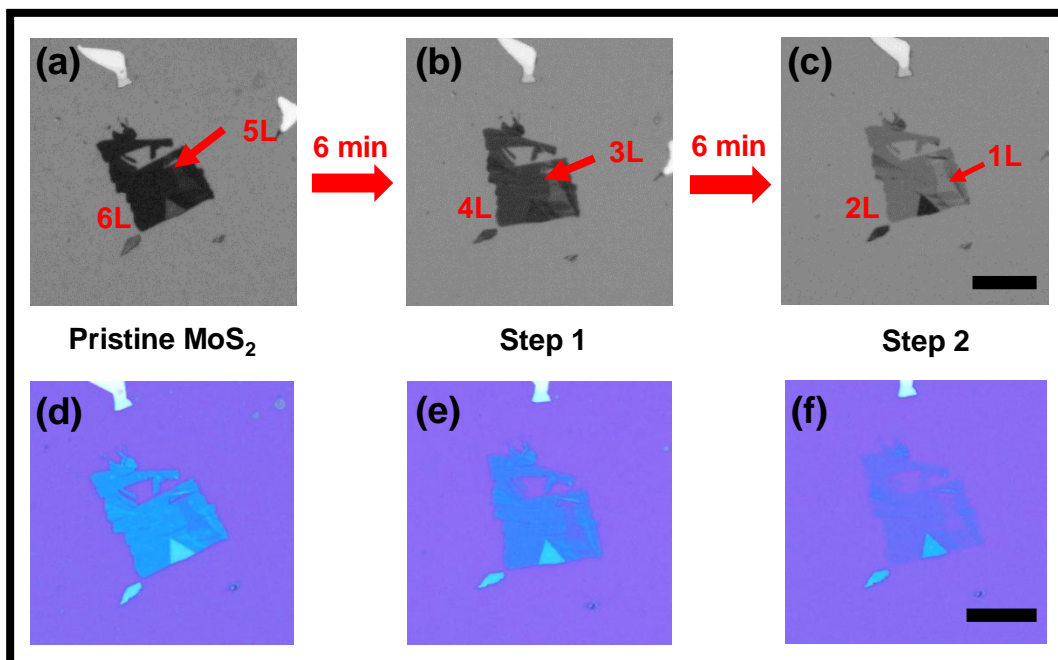

### S3: Roughness analysis of pristine and plasma exposed MoS<sub>2</sub> samples

| Scan area 1 $\mu\text{m}$ X 1 $\mu\text{m}$ and 2 $\mu\text{m}$ X 2 $\mu\text{m}$ |                    |                        |
|-----------------------------------------------------------------------------------|--------------------|------------------------|
| Sample code                                                                       | RMS roughness (nm) | Average roughness (nm) |
| S-153                                                                             | 0.42               | 0.32                   |
| S-136                                                                             | 0.47               | 0.35                   |
| S-51 (pristine)                                                                   | 0.38               | 0.30                   |
| S-42 (pristine)                                                                   | 0.23               | 0.18                   |

#### Roughness values

A Bruker Dimensions Edge atomic force microscope was used to obtain the height profile data for the above samples. The values of RMS roughness ( $R_q$ ) and average roughness ( $R_a$ ) are obtained using **Gwyddion**, a commonly used data processing software for AFM. The values were verified using **Nanoscope Analysis** software.

## S4: AFM height profiles of monolayer and 4-layer samples

### Monolayer MoS<sub>2</sub>

AFM height profile and optical image of a large area plasma thinned monolayer MoS<sub>2</sub> (sample S-172). Scale bar is 20 μm.

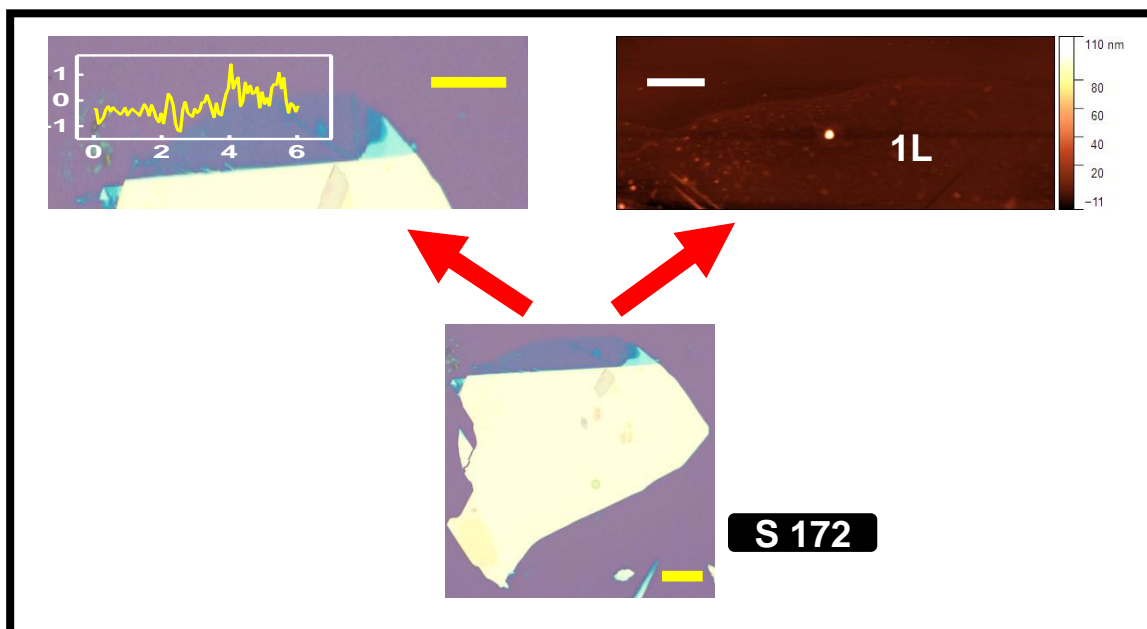

### Four-layer MoS<sub>2</sub>

AFM height profile and optical image of S-146 with regions corresponding to 6 layers and four layers as shown by AFM. The R-channel image of the sample is shown in the second column of Fig. 1 (b). Scale bar is 20 μm.

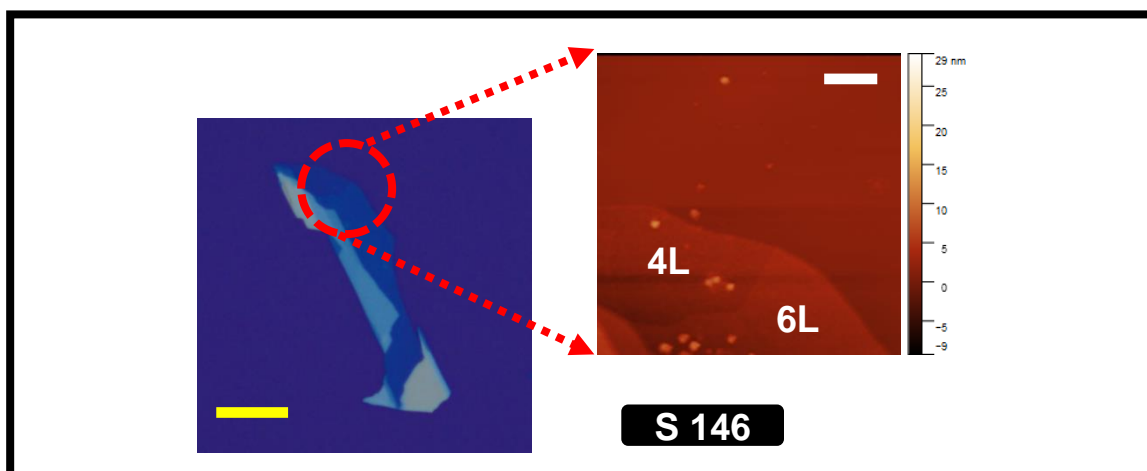

## S5: Extended Raman Spectra of MoS<sub>2</sub>

Wide range Micro-Raman Spectra of monolayer MoS<sub>2</sub> sample S- 172 using 532 nm excitation laser ( Horiba Xplora Plus) is shown below. The characteristic E<sup>1</sup><sub>2g</sub> and A<sub>1g</sub> peaks are sharp and the peak at ~520 cm<sup>-1</sup> corresponds to Si. The spectra shows no emergence of defect-related peaks. The characteristic Raman peaks of MoO<sub>3</sub> are also not observed. Similar spectra are observed for all of our plasma treated samples.

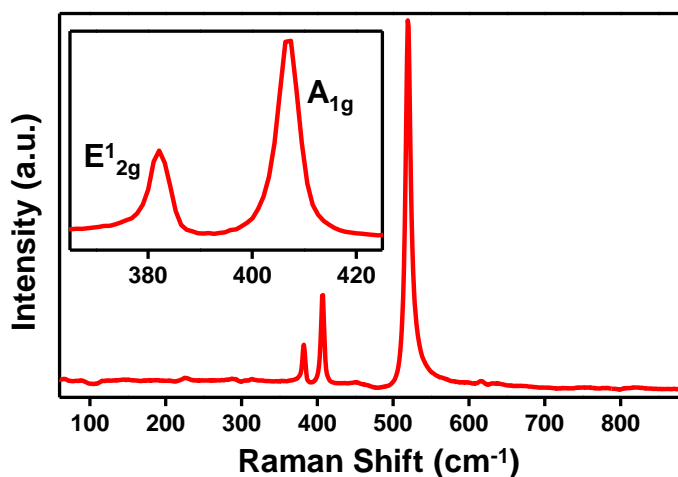

## S6: Photoluminescence spectra of pristine monolayer sample

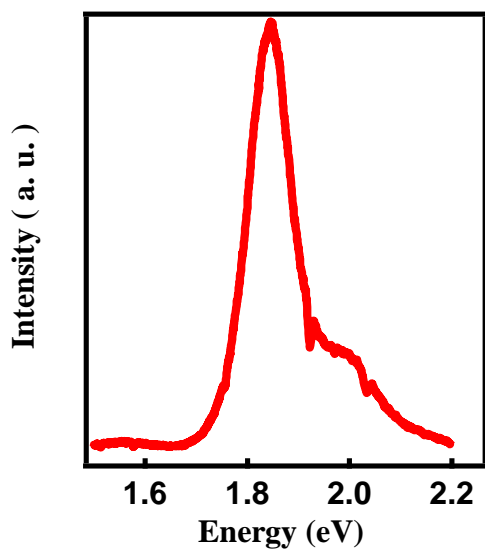

## S7: Half etched sample (S-91)

We selectively etch-down a portion of a pristine sample exploiting the metal masking technique described in Fig. 1 (e) to study the change in surface roughness due to plasma exposure. Figure (a) shows the optical image of pristine sample S-91, and Figure (b) depicts the optical image of the sample after the metal-masking followed by etching. Figure (c) shows the AFM height profile of the sample; the left-half of the sample was masked while the right-half has been etched down to a thickness of 12 nm starting from a thickness of  $\sim 48$  nm. The bottom inset shows the line-profile taken along the blue dashed arrow. The step in the height profile and the line-cut highlighted by the dotted circle in Fig. (c) is caused by the removal of a few layers of the material from the undercut region, an artefact of the photolithography. Scale bar is 20  $\mu\text{m}$ .

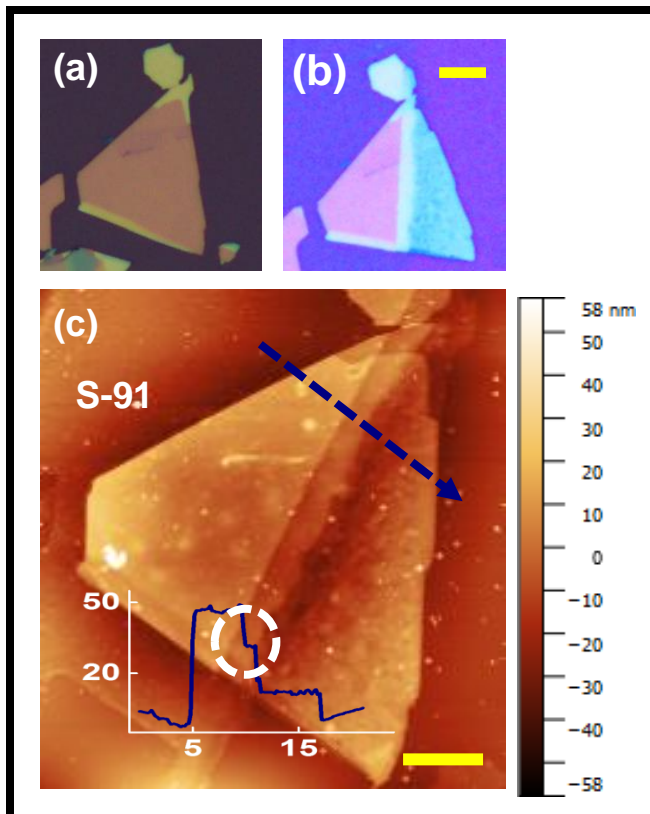



## S8: Transconductance of pristine MoS<sub>2</sub> sample

Transconductance data of a pristine exfoliated MoS<sub>2</sub> sample. Inset shows optical image of the device. Scale bar is 20  $\mu\text{m}$ .

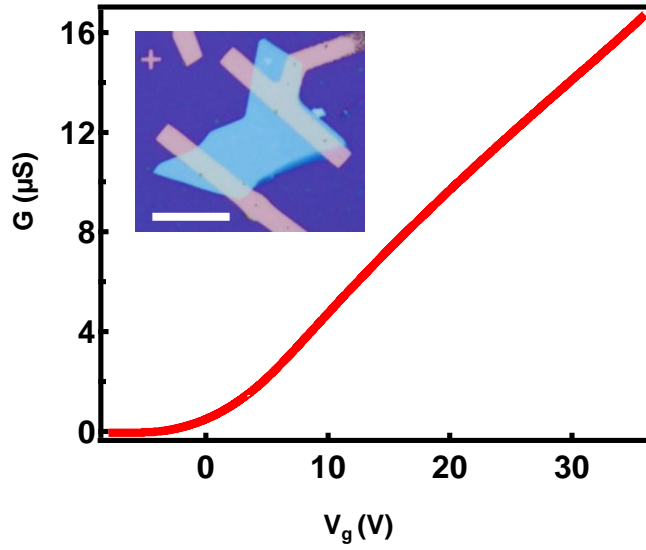

Supplement: c7nr00284j1.pdf [file c7nr00284j1.pdf]
